# Supplementary material for: Establishment of a two-dimensional liquid chromatography-tandem mass spectrometry system for detection of four tobacco-specific N-nitrosamines
Source: Royal Society of Chemistry journal article supplement (doi:10.1039/c6ay02762h), 2017-01-01
Supplement: c6ay02762h1.pdf [file c6ay02762h1.pdf]

Electronic supplementary information (ESI) for

## Establishment of a two-dimensional liquid chromatography-tandem mass spectrometry system for detection of four tobacco specific N-nitrosamines

*Xi Shao,<sup>a</sup> Min Chen,<sup>b</sup> Da Wu,<sup>b</sup> Baizhan Liu,<sup>b</sup> Xiangmin Zhang,<sup>\*a</sup> and Chaoying Chen<sup>\*b</sup>*

<sup>a</sup>Department of Chemistry and Institutes of Biomedical Sciences, Fudan University, Shanghai 200433, China.

E-mail: xmzhang@fudan.edu.cn; Fax: +86-21-65641740; Tel: +86-21-55664165

<sup>b</sup>Technology R&D Center, Shanghai Tobacco Group Co., LTD., Shanghai 200082, China.

### Materials and methods:

One piece of Cambridge filter was put into a conical flask, then 20 mL NH<sub>4</sub>Ac solution with deuterated internal standard (5 ng/mL d<sub>4</sub>-NNN, d<sub>4</sub>-NNK, d<sub>4</sub>-NAT and 1 ng/mL d<sub>4</sub>-NAB) was added. The TSNAs were fully extracted under ultrasonication vibration for 40 min. After 5 minutes standing, all the extract solution was transferred to a centrifuge tube and centrifuged for 5 min, 10000 rpm. 1 mL supernatant was taken out and filtered by the 0.22 μm filter membrane. The final solution was ready for LC-MS analysis.

ESI was performed in the positive ion mode (ion spray voltage 5500 V) with nitrogen as nebulizing gas (483 kPa), heater gas (483 kPa), curtain gas (172 kPa), and collision gas (41 kPa). The turbo ion spray temperature was set at 550 °C. The dwell time was set at 50 ms.

### Figures and tables:

**Table S1** The formulas of 7 standard work solutions. All of them contained deuterated internal standard (5 ng/mL d<sub>4</sub>-NNN, d<sub>4</sub>-NNK, d<sub>4</sub>-NAT and 1 ng/mL d<sub>4</sub>-NAB).

| Number | NNN, NNK, NAT<br>(ng/mL) | NAB<br>(ng/mL) |
|--------|--------------------------|----------------|
| 1      | 0.5                      | 0.1            |
| 2      | 1.25                     | 0.25           |
| 3      | 2.5                      | 0.5            |
| 4      | 5                        | 1              |
| 5      | 10                       | 2              |
| 6      | 25                       | 5              |
| 7      | 50                       | 10             |

**Table S2** Parameters of multiple reaction monitoring analysis of the four TSNAs and their internal standards.

| Analyte             | Precursor ion (m/z) | Declustering potential (V) | Product ion (m/z) | Collision energy (eV) |
|---------------------|---------------------|----------------------------|-------------------|-----------------------|
| NNN                 | 178.1 <sup>a</sup>  | 41                         | 148.1             | 16                    |
|                     | 178.1 <sup>b</sup>  | 41                         | 120.1             | 16                    |
| NNK                 | 208.1 <sup>a</sup>  | 41                         | 122.1             | 12                    |
|                     | 208.1 <sup>b</sup>  | 41                         | 148.1             | 12                    |
| NAT                 | 190.1 <sup>a</sup>  | 41                         | 160.0             | 30                    |
|                     | 190.1 <sup>b</sup>  | 41                         | 106.1             | 21                    |
| NAB                 | 192.1 <sup>a</sup>  | 41                         | 162.1             | 13                    |
|                     | 192.1 <sup>b</sup>  | 41                         | 133.1             | 13                    |
| d <sub>4</sub> -NNN | 182.1               | 43                         | 152.1             | 14                    |
| d <sub>4</sub> -NNK | 212.1               | 42                         | 126.1             | 15                    |
| d <sub>4</sub> -NAT | 194.1               | 37                         | 164.0             | 20                    |
| d <sub>4</sub> -NAB | 196.1               | 42                         | 166.0             | 13                    |

<sup>a</sup> Quantitation ion; <sup>b</sup> Confirmation ion.

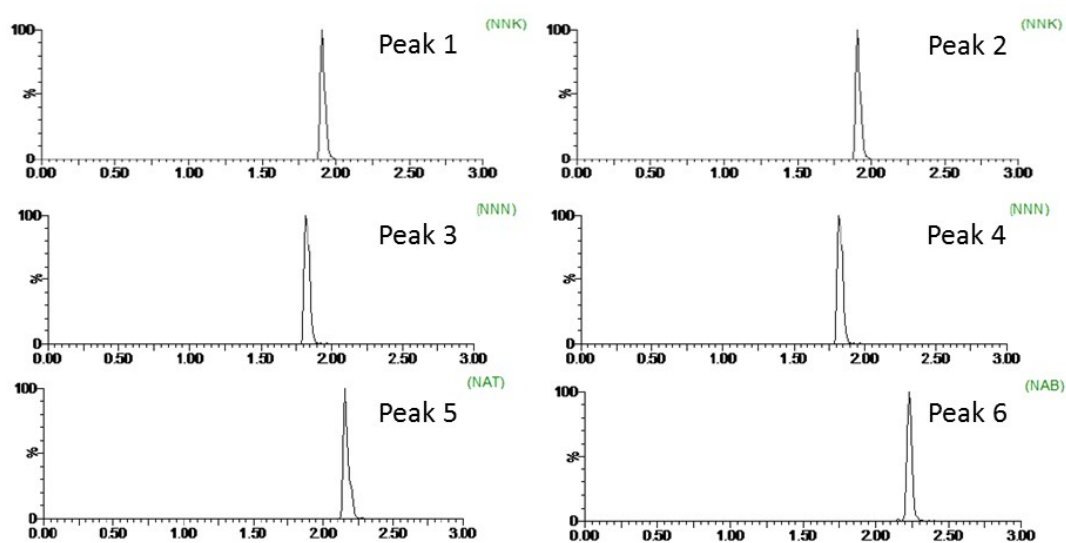**Fig. S1** Chromatograms of six peaks of Fig 2(D) in MRM mode.
